# Supplementary material for: The colonic polyphenol catabolite dihydroferulic acid (DHFA) regulates macrophages activated by oxidized LDL, 7-ketocholesterol, and LPS switching from pro- to anti-inflammatory mediators
Source: Royal Society of Chemistry journal article supplement (doi:10.1039/d4fo02114b), 2024-01-01
Supplement: d4fo02114b1.pdf [file d4fo02114b1.pdf]

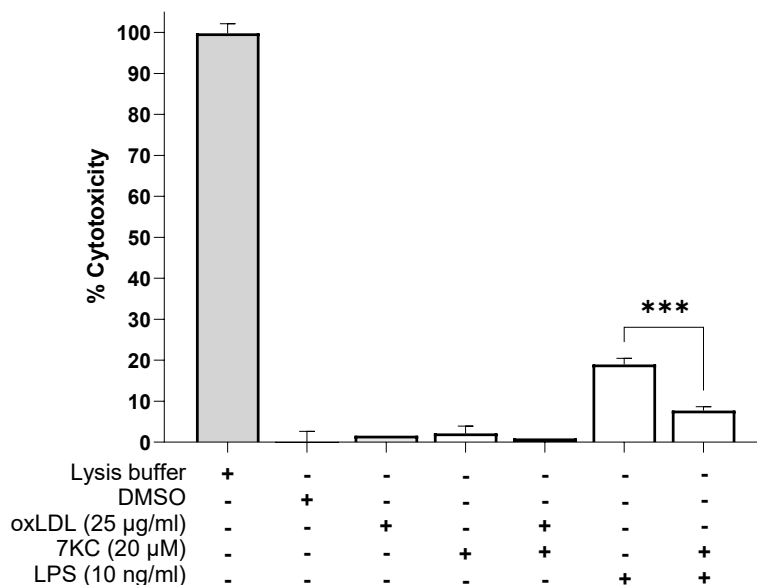

**Supplementary Figure 1.** Cell viability in the inflammatory and oxidative stress model under induction of 7KC, oxLDL, LPS after (A) 36 h of treatments.

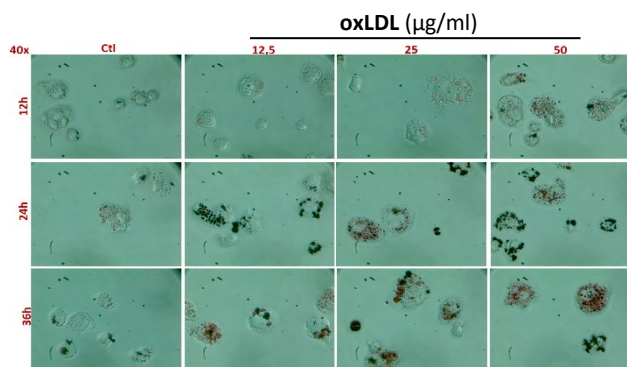

**Supplementary Figure 2.** Representative photographs (original magnification: 40 X) of morphological changes and lipid droplet formations in macrophages after oxLDL treatment. THP-1 macrophages were incubated in the absence (Ctrl group) or presence of indicated concentrations of oxLDL for 12, 24 and 36 h. The cells were fixed with 10% formalin and stained with oil red O (ORO) for 1 min<sup>1</sup>.

#### References

- 1 S. Xu, Y. Huang, Y. Xie, T. Lan, K. Le, J. Chen, S. Chen, S. Gao, X. Xu, X. Shen, H. Huang and P. Liu, *Cytotechnology*, 2010, **62**, 473–481.
